# Supplementary figures and images for: Identification and Validation of PTGS2 Gene as an Oxidative Stress-Related Biomarker for Arteriovenous Fistula Failure
Source: MDPI journal article supplement (doi:10.3390/antiox13010005), 2023-12-19

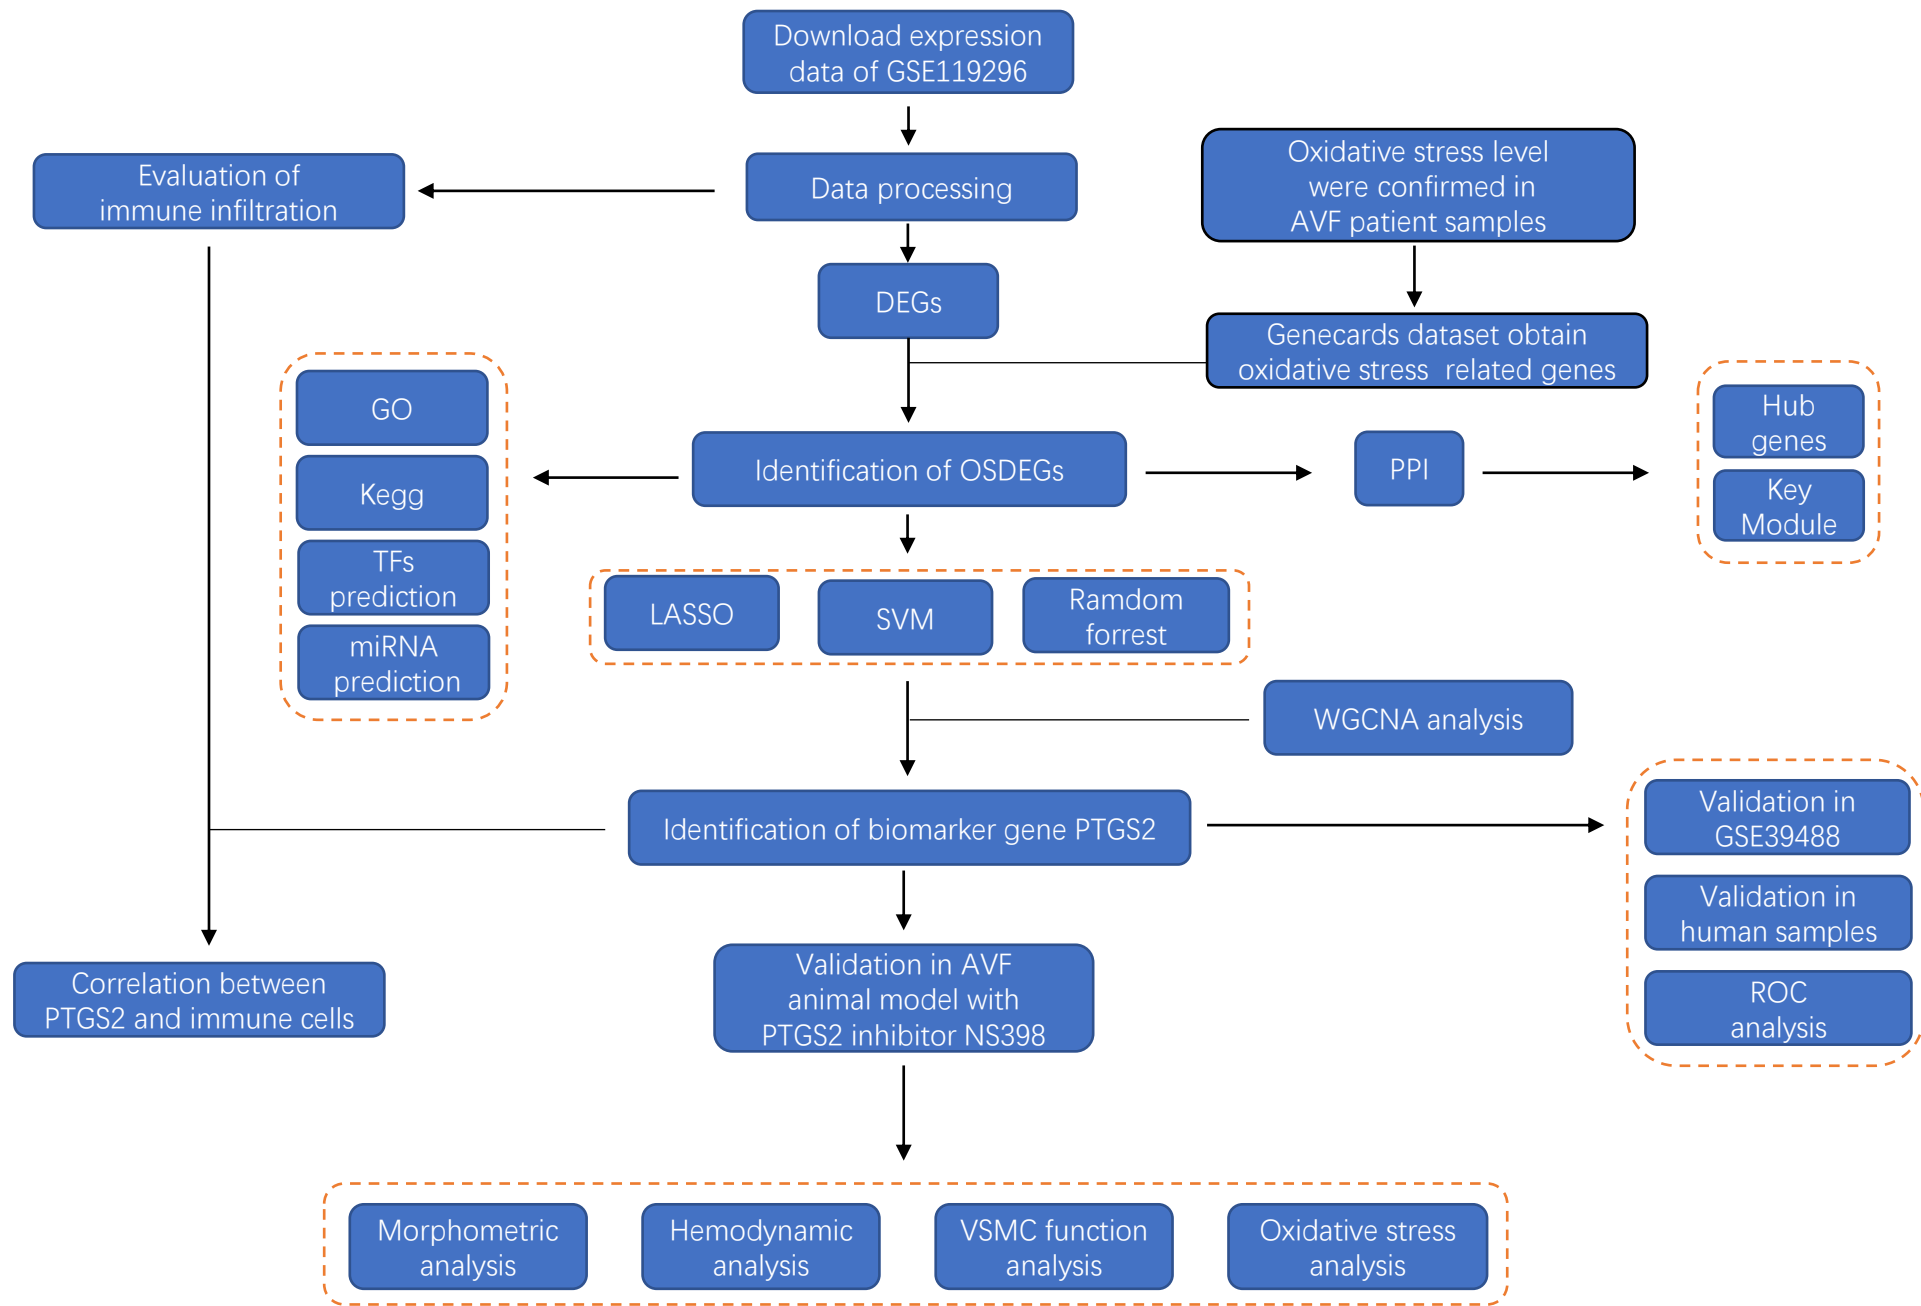

Supplement: s1 [file s1]
